# Supplementary material for: Multi-faceted design of a silicon anode for high performance lithium ion batteries using silicon nanoparticles encapsulated by a multiple graphene aerogel electrode material and a tryptophan-functionalized graphene quantum dot–sodium alginate binder
Source: Royal Society of Chemistry journal article supplement (doi:10.1039/c6ra15257k), 2016-01-01
Supplement: c6ra15257k1.pdf [file c6ra15257k1.pdf]

# Multi-faceted design of silicon anode for high performance lithium ion batteries using silicon nanoparticles encapsulated by multiple graphene aerogel electrode material and tryptophan-functionalized graphene quantum dots-sodium alginate binder

Kong Lijuan<sup>a</sup>, Li Ruiyi<sup>a</sup>, Yang Yongqiang<sup>b</sup> and Li Zaijun<sup>\*a,c</sup>

<sup>a</sup>School of Chemical and Material Engineering, Jiangnan University, Wuxi 214122, China

<sup>b</sup>Jiangsu graphene inspection technology key laboratory, Jiangsu Province Special Equipment Safety Supervision and Inspection Institute Branch of Wuxi 214122, China

<sup>c</sup>Key Laboratory of Food Colloids and Biotechnology, Ministry of Education, Wuxi 214122, China

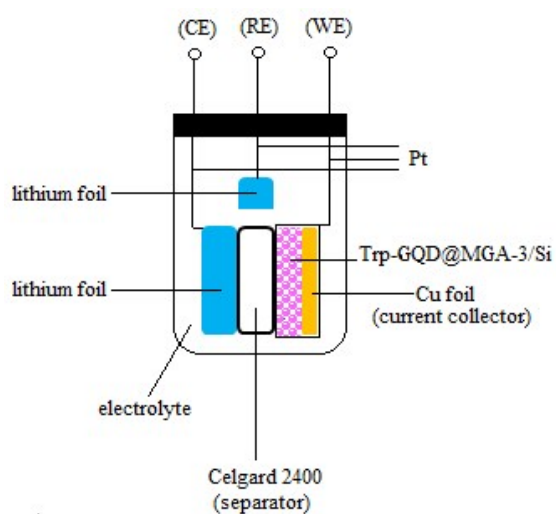

Fig. s1 The structure of three-electrode cell

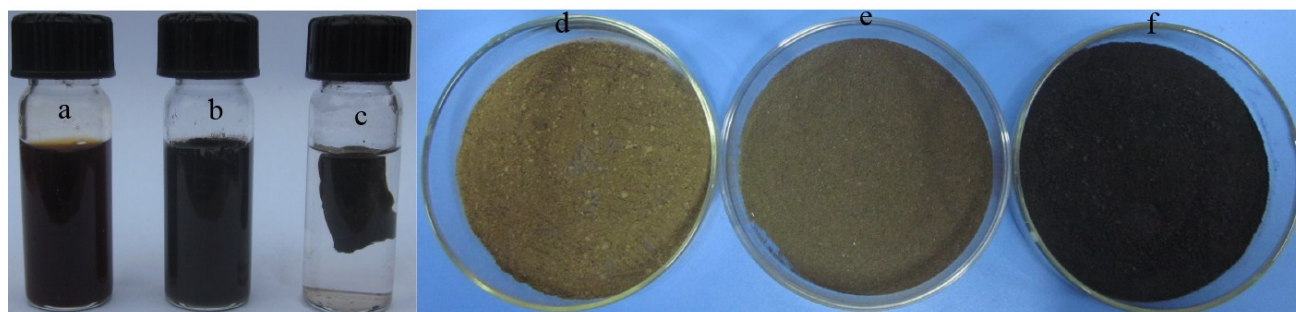

Fig. s2 The photographs of the GO dispersion before (a) and after added ascorbic acid for 5 min (b) and 30 min (c) at 70°C, and the photographs of the MGA-1/Si (d), MGA-2/Si (e) and MGA-3/Si (f).

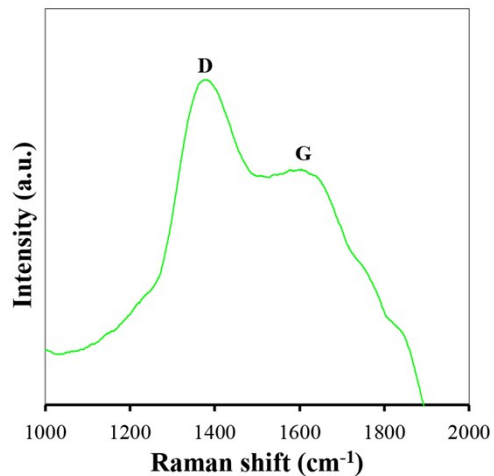

Fig. s3 Raman spectroscopy of Trp-GQD

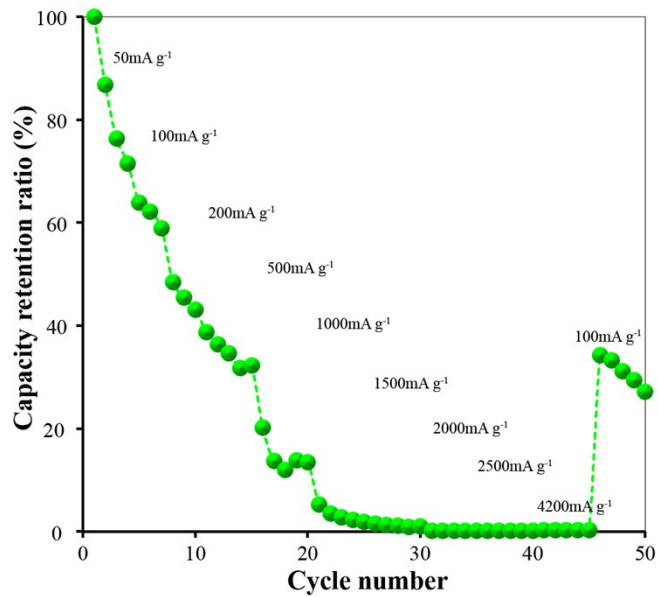

Fig. s4 The capacity retention ratio of Si electrode at different current densities

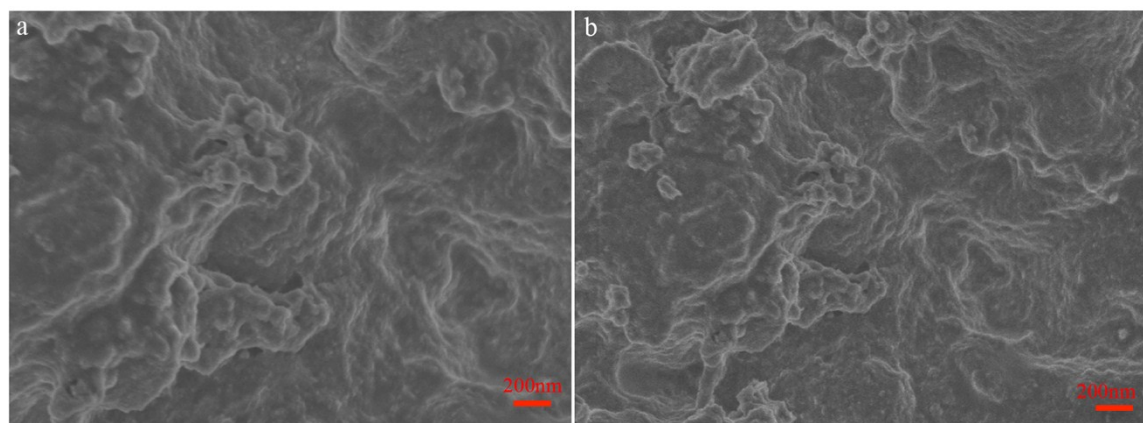

Fig. s5 The SEM images of Trp-GQD@MGA-n/Si electrode before (a) and after 100 cycles (b)
